# Supplementary material for: Alginate Alleviates Dextran Sulfate Sodium-Induced Colitis by Promoting Bifidobacterium animalis and Intestinal Hyodeoxycholic Acid Synthesis in Mice
Source: PubMed Central journal article supplement (PMC9769733; doi:10.1128/spectrum.02979-22), 2022-10-11
Supplement: spectrum.02979-22-s0001.pdf [file spectrum.02979-22-s0001.pdf]

# 1 Supplementary Tables and Figures

A

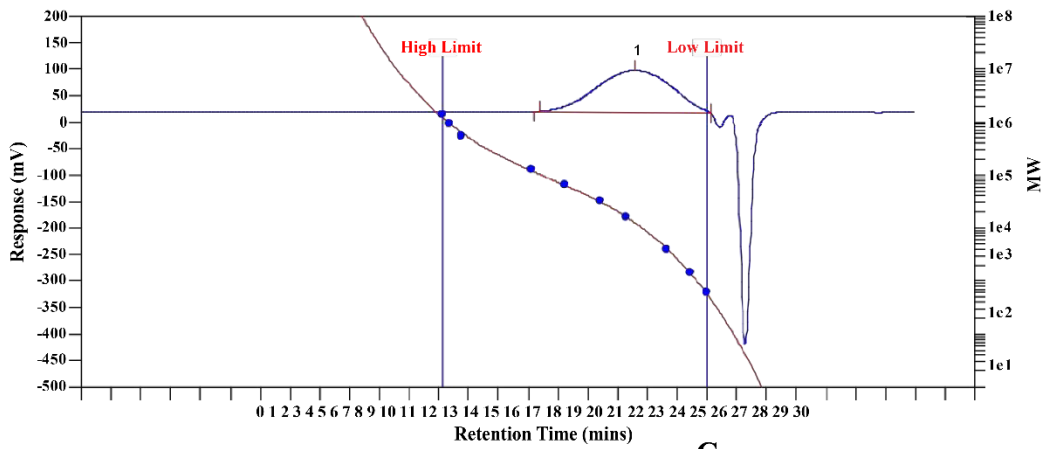

B

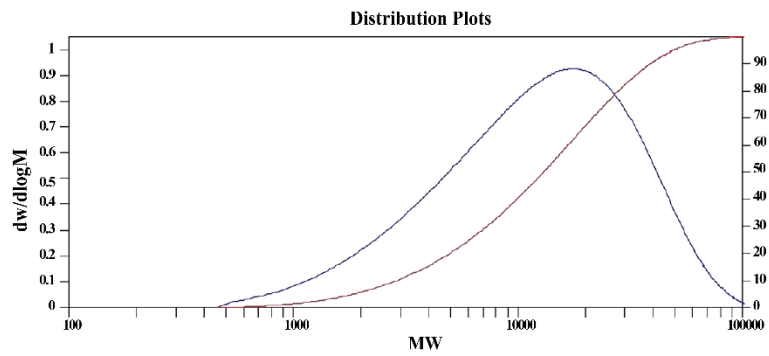

C

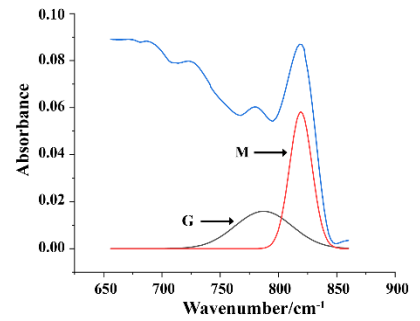

2

3 **Supplemental Figure S1. Characterization of sodium alginate (ALG).** (A) GPC

4 Chromatography of ALG. (B) The distribution plots of molecular weight of ALG. (C) Absorption

5 spectra of ALG by infrared spectra. M and G represent the peak absorption of  $\beta$ -D-mannuronic

6 acid and  $\alpha$ -L-guluronic acid, respectively.

7 **Supplemental Table S1. Parameters and criteria of histological damage evaluation<sup>1,2</sup>**

| Parameters                             | Score | Histological features  |
|----------------------------------------|-------|------------------------|
|                                        | 0     | No change              |
| (1) Loss of epithelial surface         | 1     | Localized and mild     |
| (2) Destruction of the crypts          | 2     | Localized and moderate |
| (3) Infiltration of inflammatory cells | 3     | Localized and severe   |
|                                        | 4     | Extensive and moderate |
|                                        | 5     | Extensive and severe   |

8 <sup>1</sup> Each parameter is scored separately on a scale of 0-5. The histological score is the sum of the scores from all three parameters.

9 <sup>2</sup> The method was adopted from a previous study with modifications (1).

10

**Supplemental Table S2. Scoring of the disease activity index (DAI)<sup>1,2</sup>**

| Score | Weight loss (%) | Stool consistency | Fecal blood content       |
|-------|-----------------|-------------------|---------------------------|
| 0     | None            | Normal            | Normal                    |
| 1     | 0-10            |                   |                           |
| 2     | 11-15           | Loose stool       | Occult blood              |
| 3     | 16-20           |                   |                           |
| 4     | > 20            | Diarrhea          | Hemorrhage/Gross bleeding |

11 <sup>1</sup> The DAI score is defined as the sum of three scores from weight loss (%), stool consistency, and fecal blood content.

12 <sup>2</sup> The method was adopted from a previous study (2).

**Supplemental Table S3. Primers used in this study<sup>1</sup>**

| Target gene                      | Forward primer (5'-3')    | Reverse primer (5'-3')    | Annealing temp. (°C) | References             |
|----------------------------------|---------------------------|---------------------------|----------------------|------------------------|
| <b>For host genes of mouse</b>   |                           |                           |                      |                        |
| IL-1 $\beta$                     | CTCGCAGCAGCACATCAACAAG    | GGAAGGTCCACGGGAAAGACAC    | 60                   | (3)                    |
| TNF- $\alpha$                    | TGGGAGTAGACAAGGTACAACCC   | CATCTTCTCAAAATTCGAGTGACAA | 60                   | (3)                    |
| IL-6                             | ACCACGGCCTTCCTACTT        | CACAACCTCTTTTCTCATTCCAC   | 60                   | (3)                    |
| FXR                              | TGGGCTCCGAATCCTCTTAGA     | TGGTCCTCAAATAAGATCCTTGG   | 60                   | (4)                    |
| TGR5                             | CCTGGCAAAGCCTCATCGTC      | AGCAGCCCCGGCTAGTAGTAG     | 60                   | (4)                    |
| $\beta$ -actin                   | TGGAATCCTGTGGCATCCATGAAAC | TAAAACGCAGCTCAGTAACAGTCCG | 60                   | (3)                    |
| <b>For bacteria</b>              |                           |                           |                      |                        |
| Total bacteria                   | GTGSTGCAYGGYYGTCGTCA      | ACGTCRTCCMCNCCTTCCTC      | 60                   | (5)                    |
| <i>baiJ</i>                      | TCAGGACGTGGAGGCGATCCA     | TACRTGATACTGGTAGCTCCA     | 60                   | (6)                    |
| <i>bsh</i>                       | ATGGGCGGACTAGGATTACC      | TGCCACTCTCTGTCTGCATC      | 54                   | (7)                    |
| <i>7<math>\alpha</math>-HSDH</i> | GGGTATTGTGTATCAAAAGCTGCGG | TCCGTTGCTATAAGCCCAGGTAAGA | 60                   | This study; MH743112.1 |
| <i>7<math>\beta</math>-HSDH</i>  | GTCGTAAGCAGACTTTTCGCTGC   | TTGATCATTGCCTCATGCTTTTCC  | 60                   | This study; KF052988.1 |

14 <sup>1</sup> IL-6, interleukin-6; IL-1 $\beta$ , interleukin-1 $\beta$ ; TNF- $\alpha$ , tumor necrosis factor- $\alpha$ ; FXR, farnesoid X receptor; TGR5, G-coupled protein  
15 receptor; *baiJ*, genes encoding bile salt 7 $\alpha$ -dehydroxylase; *bsh*, genes encoding bile salt hydrolase; 7 $\alpha$ -HSDH, genes encoding 7 $\alpha$ -  
16 hydroxysteroid dehydrogenase; 7 $\beta$ -HSDH, genes encoding 7 $\beta$ -hydroxysteroid dehydrogenase.

17

18

## 19 REFERENCES

- 20 1. Wang SL, Zhang SY, Huang SM, Wu ZH, Pang JM, Wu YJ, Wang JJ, Han DD. 2020. Resistant maltodextrin  
21 alleviates dextran sulfate sodium-induced intestinal inflammatory injury by increasing butyric acid to inhibit  
22 proinflammatory cytokine levels. *Biomed Res Int* 2020: 7694734.
- 23 2. Park YH, Kim N, Shim YK, Choi YJ, Nam RH, Choi YJ, Ham MH, Suh JH, Lee SM, Lee CM, Yoon H, Lee  
24 HS, Lee DH. 2015. Adequate dextran sodium sulfate-induced colitis model in mice and effective outcome  
25 measurement method. *J Cancer Prev* 20: 260-267.
- 26 3. Huang SM, Wu ZH, Liu C, Han DD, Feng CP, Wang SL, Wang JJ. 2019. Milk fat globule membrane  
27 supplementation promotes neonatal growth and alleviates inflammation in low-birth-weight mice treated  
28 with lipopolysaccharide. *Biomed Res Int* 2019: 4876078.
- 29 4. Sun LL, Xie C, Wang G, Wu Y, Wu Q, Wang XM, Liu J, Deng YY, Xia JL, Chen B, Zhang SY, Yun CY, Lian  
30 G, Zhang XJ, Zhang H, Bisson WH, Shi JM, Gao XX, Ge PP, Liu CH, Krausz KW, Nichols RG, Cai JW,  
31 Rimal B, Patterson AD, Wang X, Gonzalez FJ, Jiang CT. 2018. Gut microbiota and intestinal FXR mediate  
32 the clinical benefits of metformin. *Nat Med* 24: 1919-1929.
- 33 5. Maeda H, Fujimoto C, Haruki Y, Maeda T, Koikeguchi S, Petelin M, Arai H, Tanimoto I, Nishimura F,  
34 Takashiba S. 2003. Quantitative real-time PCR using TaqMan and SYBR Green for *Actinobacillus*  
35 *actinomycetemcomitans*, *Porphyromonas gingivalis*, *Prevotella intermedia*, tetQ gene and total bacteria.  
36 *Fems Immunol Med Mic* 39: 81-86.
- 37 6. Yoshimoto S, Loo TM, Atarashi K, Kanda H, Sato S, Oyadomari S, Iwakura Y, Oshima K, Morita H, Hattori  
38 M, Honda K, Ishikawa Y, Hara E, Honda K. 2013. Obesity-induced gut microbial metabolite  
39 promotes liver cancer through senescence secretome. *Nature* 499: 97-101.
- 40 7. Duary RK, Batish VK, Grover S. 2012. Relative gene expression of bile salt hydrolase and surface proteins  
41 in two putative indigenous *Lactobacillus plantarum* strains under in vitro gut conditions. *Mol Biol Rep* 39:  
42 2541-52.

43
